# Supplementary material for: Long-Term Influence of Locus of Control and Quality of Life on Metabolic Profile in Elderly Subjects with Type 2 Diabetes
Source: MDPI journal article supplement (doi:10.3390/ijerph192013381), 2022-10-17
Supplement: s1 [file s1]

**Supplemental Table S1.** Change from baseline in study variables during the 6 years-follow-up, according to gender.

| Variable                                  | Change from baseline | Women<br>n=41 | Men<br>n=63   | p    |
|-------------------------------------------|----------------------|---------------|---------------|------|
| Weight (Kg)                               | -0.02 ± 0.066        | -0.01 ± 0.06  | 0.14 ± 1.24   | 0.36 |
| BMI (Kg/m <sup>2</sup> )                  | -0.02 ± 0.063        | -0.01 ± 0.05  | -0.03 ± 0.06  | 0.13 |
| HbA1c (%)                                 | -0.004 ± 0.10        | 0.01 ± 0.10   | -0.01 ± 0.11  | 0.27 |
| Patients with HbA1c ≤7.0% (%)             | -17.3%               | -14.6%        | -19.0%        | 0.54 |
| eGFR (ml/min/1.73 m <sup>2</sup> )        | -0.015 ± 0.29        | -0.02 ± 0.25  | -0.005 ± 0.32 | 0.71 |
| Subjects with chronic complications n (%) | +38%                 | +26.8%        | + 28.6%       | 0.89 |
| Intensification of diabetes therapy (%)*  | +30                  | +31.6%        | +26.9%        | 0.79 |

Data are mean ± SD; \*Intensification of diabetes therapy: increase in the number of OHA or addition of injection drugs (insulin or GLP-1 RAs).

**Supplemental Table S2.** Tests scores at baseline, in T2D subjects developing or not developing new chronic complications.

| Clinical baseline characteristics              | Subjects developing new chronic complications | Subjects not developing new chronic complications | p     |
|------------------------------------------------|-----------------------------------------------|---------------------------------------------------|-------|
| Mini Mental State Examination (MMSE)           | 24.71 ± 2.79                                  | 26.63 ± 2.91                                      | 0.07  |
| ADL (Activities of Daily Living)               | 5.79 ± 0.71                                   | 5.81 ± 0.49                                       | 0.058 |
| IADL (Instrumental Activities of Daily Living) | 7.63 ± 0.89                                   | 7.67 ± 0.93                                       | 0.065 |
| Diabetes Treatment Satisfaction Questionnaire  |                                               |                                                   |       |
| total score                                    | 31.81 ± 5.11                                  | 32.34 ± 4.94                                      | 0.08  |
| DTSQ 2                                         | 2.7 ± 1.77                                    | 3.0 ± 1.83                                        | 0.20  |
| DTSQ 3                                         | 1.6 ± 1.66                                    | 1.6 ± 1.79                                        | 0.058 |
| Diabetes Specific Quality of Life (DSQoL)      |                                               |                                                   |       |
| <i>Satisfaction</i>                            | 33.16 ± 9.38                                  | 30.3 ± 9.08                                       | 0.17  |
| <i>Impact</i>                                  | 37.51 ± 8.23                                  | 35.15 ± 9.02                                      | 0.21  |
| <i>Worry</i>                                   | 8.36 ± 2.88                                   | 8.19 ± 2.97                                       | 0.78  |
| Locus of Control (LOC)                         |                                               |                                                   |       |
| <i>Internal</i>                                | 29.05 ± 6.48                                  | 30.89 ± 5.78                                      | 0.19  |
| <i>External</i>                                | 24.52 ± 5.69                                  | 24.96 ± 5.93                                      | 0.73  |
| <i>Chance</i>                                  | 18.21 ± 7.62                                  | 18.37 ± 8.09                                      | 0.92  |

Data are mean ± SD;

DTSQ 2: perceived hyperglycaemia; DTSQ 3: perceived hypoglycaemia;

MMSE: Mini Mental State Examination; DSQoL: Diabetes Specific Quality of Life LOC: Locus of Control; DTSQ: Diabetes Treatment Satisfaction Questionnaire.

**Supplemental Figure S1.** Box plots for the association of good metabolic control maintenance with baseline HbA1c and LOC External.

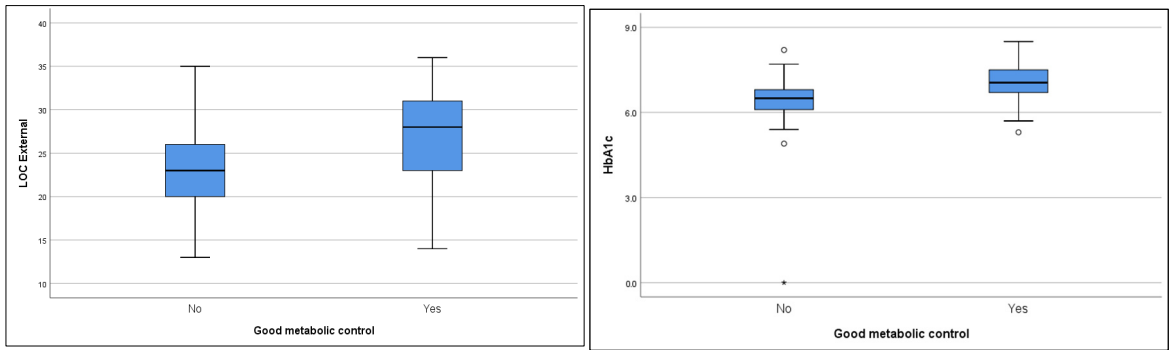

LOC: Locus of Control.
